# Supplementary material
Source: PubMed Central journal article supplement (PMC4861368)
Supplement: supp_the2015-0498_Supplemental_Tables.pdf [file supp_the2015-0498_Supplemental_Tables.pdf]

Supplemental Table for:

U.S. Food and Drug Administration Approval Summary: Pembrolizumab for the Treatment of Patients with Metastatic Non-Small Cell Lung Cancer whose Tumors Express Programmed Death-Ligand 1 (PD-L1)

Richard Pazdur et al.

Table S1. Keynote 001 Study Parts

| <b>Study Parts</b> | <b>Pembrolizumab Doses</b> | <b>Patient Population</b>      | <b>N</b> |
|--------------------|----------------------------|--------------------------------|----------|
| <b>A</b>           | Dose-escalation            | Solid tumors                   | 28       |
| <b>B</b>           | 10 mg/kg q2W               | Melanoma                       | 506      |
|                    | 10 mg/kg q3W               | (ipilimumab naïve, refractory) |          |
|                    | 2 mg/kg q3W                |                                |          |
| <b>C</b>           | 10 mg/kg q3W               | 3L+ NSCLC                      | 38       |
| <b>D</b>           | 10 mg/kg q3W               | Melanoma                       | 88       |
|                    | 2 mg/kg q3W                | (ipilimumab naïve)             |          |
| <b>F</b>           |                            | NSCLC                          | 11       |
|                    | F1 (Amendment 6)           | 10 mg/kg q3W<br>2 mg/kg q3W    |          |
| F1 (Amendment 7)   | 10 mg/kg q3W               | NSCLC, 1L, PDL1+               | 90       |
|                    | 10 mg/kg q2W               |                                |          |
| F2 (Amendment 6)   | 10 mg/kg q3W               | NSCLC, 3L+, PDL1+              | 33       |
| F2 (Amendment 7)   | 10 mg/kg q2W               | NSCLC, 2L+, PDL1+              | 280      |
|                    | 10 mg/kg q3W               |                                |          |
| F2 (Amendment 7)   | 10 mg/kg q2W               | NSCLC, 3L+, PDL1-              | 43       |
| F3 (Amendment 9)   | 2 mg/kg q3W                | NSCLC, 2L+, PDL1+              | 55       |

Abbreviations: q2W: every 2 weeks, q3W: every 3 weeks, 1L: first-line treatment, 2L+: second-line treatment or greater, 3L+: third-line treatment or greater
